# Supplementary material for: The Antitumor Effects of Plasma-Activated Saline on Muscle-Invasive Bladder Cancer Cells In Vitro and In Vivo Demonstrate Its Feasibility as a Potential Therapeutic Approach
Source: PubMed Central journal article supplement (PMC7958317; doi:10.3390/cancers13051042), 2021-03-02
Supplement: cancers-13-01042-s001.pdf [file cancers-13-01042-s001.pdf]

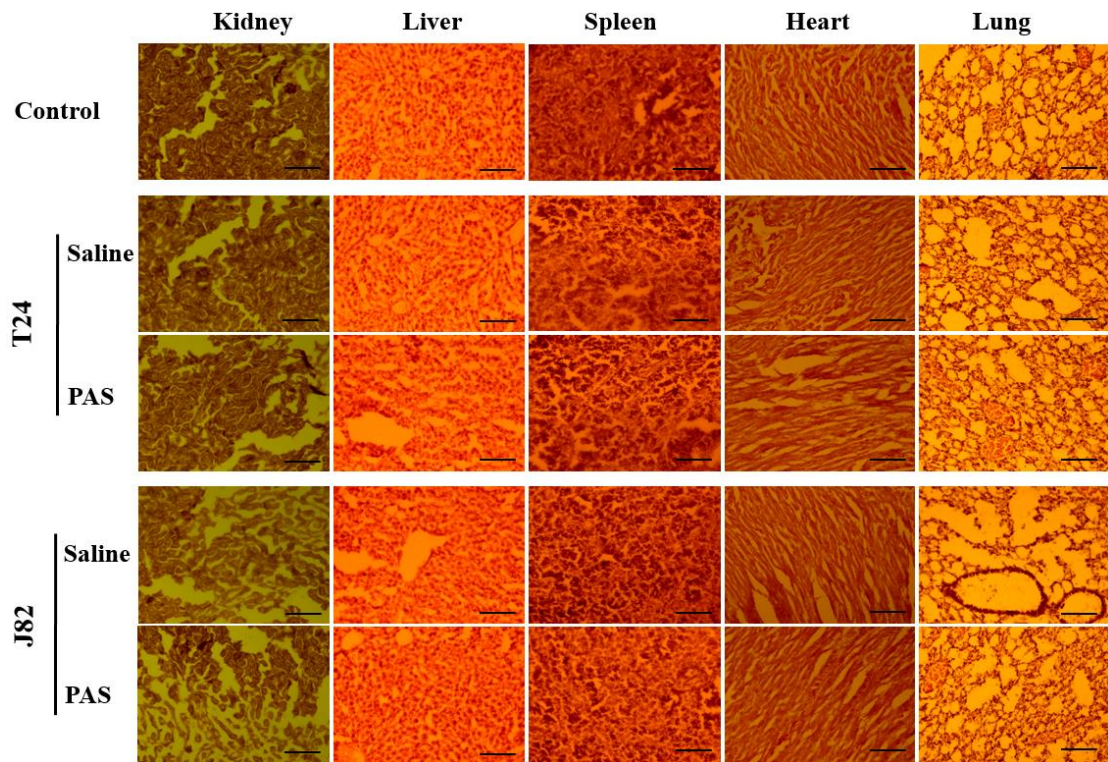

**Supplementary Figure 1.** Representative histological H&E stained tissue sections of mice organ slices after different treatments. All images share the same scale bar of 50  $\mu\text{m}$ .
